# Supplementary material for: Unmasking the intrinsic mechanistic limits of manganese Prussian blue analogues in aqueous Zn-ion batteries
Source: Royal Society of Chemistry journal article supplement (doi:10.1039/d6sc02408d), 2026-05-20
Supplement: d6sc02408d1.pdf [file d6sc02408d1.pdf]

## Unmasking the Intrinsic Mechanistic Limits of Manganese Prussian Blue Analogues in Aqueous Zn-Ion Batteries

Sankhadip Saha,<sup>a</sup> Yuan Shang,<sup>a,\*</sup> Ruichen Ma,<sup>b</sup> Xiaoran Zheng,<sup>c</sup> Priyank Kumar,<sup>b,\*</sup> Dipan Kundu<sup>a,\*</sup>

<sup>a</sup>LBRI, School of Chemical Engineering, UNSW Sydney, Kensington, NSW 2052, Australia

<sup>b</sup>School of Chemical Engineering, UNSW Sydney, Kensington, NSW 2052, Australia

<sup>c</sup>School of Chemistry, UNSW Sydney, Kensington, NSW 2052, Australia

Corresponding authors

Yuan Shang: [yuan.shang@unsw.edu.au](mailto:yuan.shang@unsw.edu.au)

Priyank Kumar: [priyank.kumar@unsw.edu.au](mailto:priyank.kumar@unsw.edu.au)

Dipan Kundu; Email: [d.kundu@unsw.edu.au](mailto:d.kundu@unsw.edu.au)

**Table S1** Composition of the three sodium variants calculated using ICP-OES and TGA

|          | Na   | Mn | Fe   | C    | N    | xH <sub>2</sub> O |
|----------|------|----|------|------|------|-------------------|
| Mn-PBA-H | 1.96 | 1  | 1    | 6    | 6    | 2.37              |
| Mn-PBA-M | 1.79 | 1  | 0.93 | 5.58 | 5.58 | 2.67              |
| Mn-PBA-L | 1.35 | 1  | 0.83 | 4.96 | 4.98 | 3.06              |

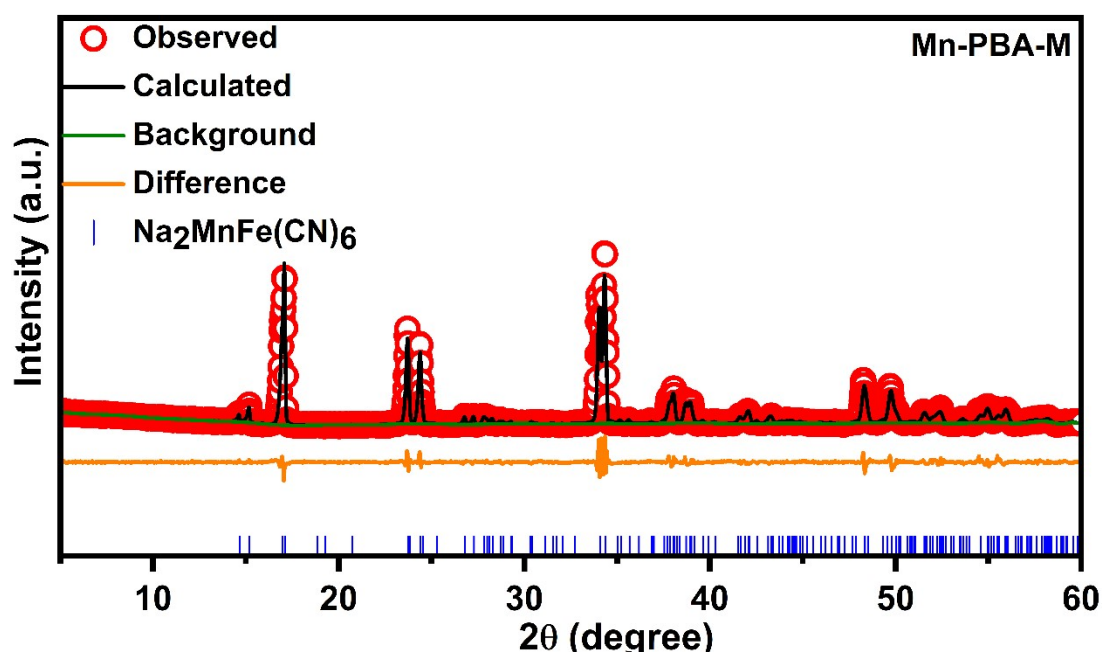

**Figure S1.** Rietveld refinement ( $R_{wp}$ :3.26%,  $\chi^2(\text{gof})$ : 2.97) of the laboratory powder XRD data of as-prepared Mn-PBA-M, using ICSD reference #266392, confirms monoclinic ( $P21/n$ ) phase. Observed data points (o symbol); calculated profile (black line); difference profile (orange line); Bragg positions (blue ticks)

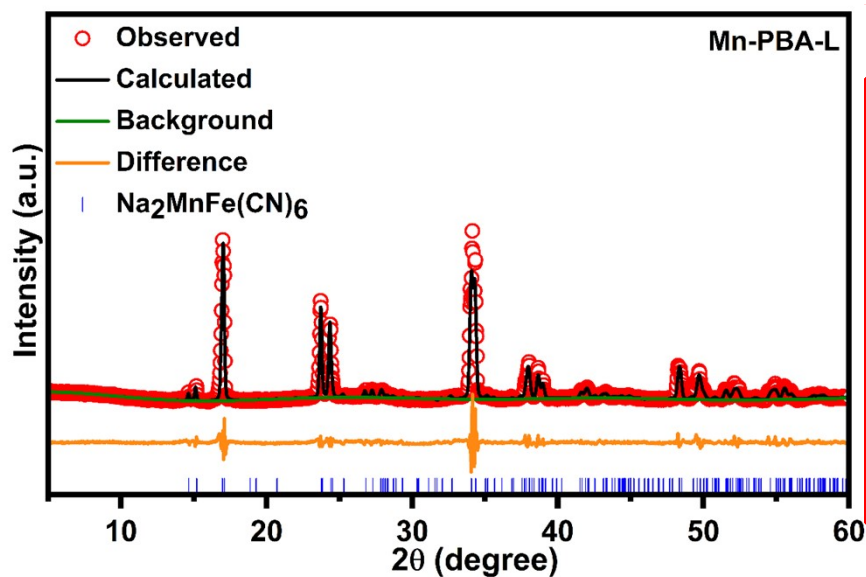

Comment [DK]: Are we going to add this plot?

Comment [SS]: Added

**Figure S2.** Rietveld refinement ( $R_{wp}$ :3.87%,  $\chi^2(\text{gof})$ :3.82 ) of the laboratory powder XRD data of as-prepared Mn-PBA-L, using ICSD reference #266392, confirms monoclinic ( $P21/n$ ) phase. Observed data points (o symbol); calculated profile (black line); difference profile (orange line); Bragg positions (blue ticks)

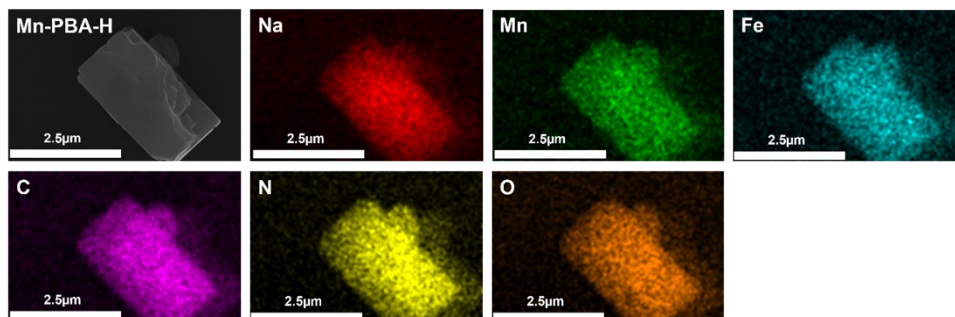

**Figure S3.** FESEM image illustrating a representative Mn-PBA-H particle accompanied by EDS elemental mapping confirming the uniform distribution of the constituent elements throughout the particles.

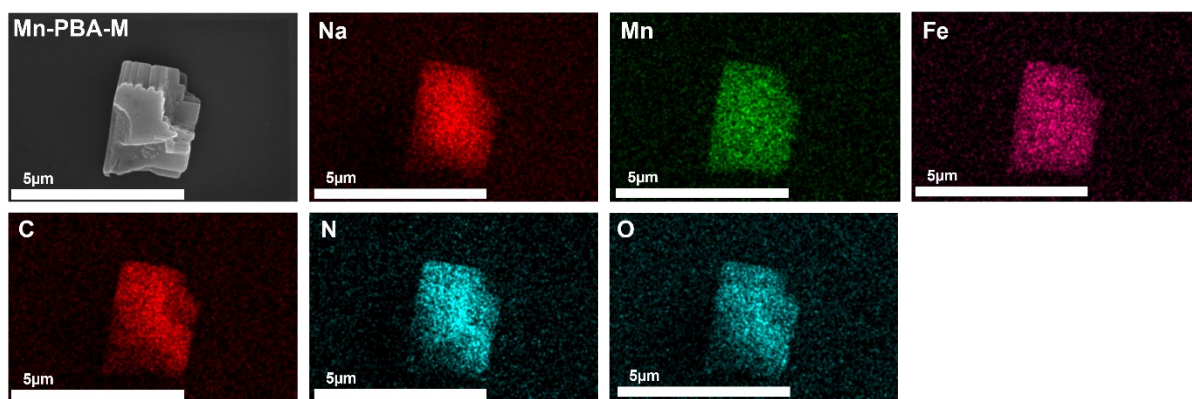

**Figure S4.** FESEM image illustrating a representative Mn-PBA-M particle accompanied by EDS elemental mapping confirming the uniform distribution of the constituent elements throughout the particles.

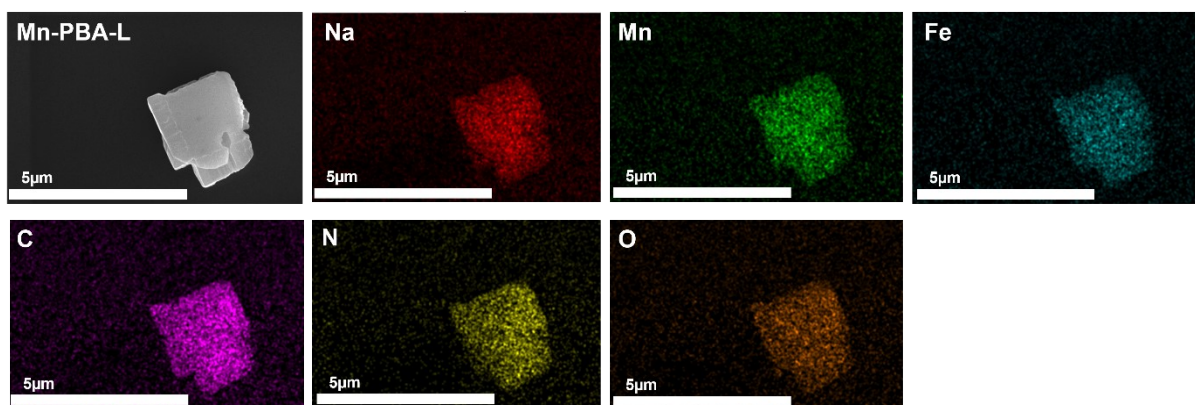

**Figure S5.** FESEM image illustrating a representative Mn-PBA-L particle accompanied by EDS elemental mapping confirming the uniform distribution of the constituent elements throughout the particles.

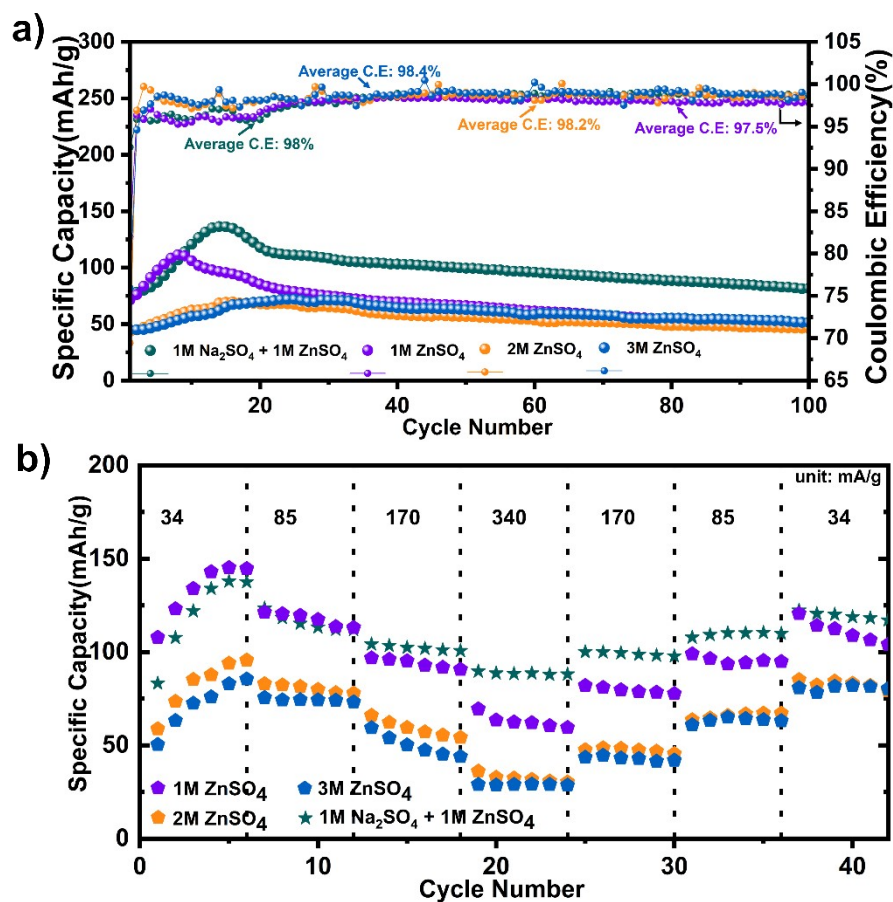

**Figure S6** (a) Long-term cycling stability of Mn-PBA-H in 1M Na<sub>2</sub>SO<sub>4</sub>+1M ZnSO<sub>4</sub> and different concentrations of 1M ZnSO<sub>4</sub> (1M, 2M and 3M). (b) Rate-capability comparison of Mn-PBA-H between the electrolytes.

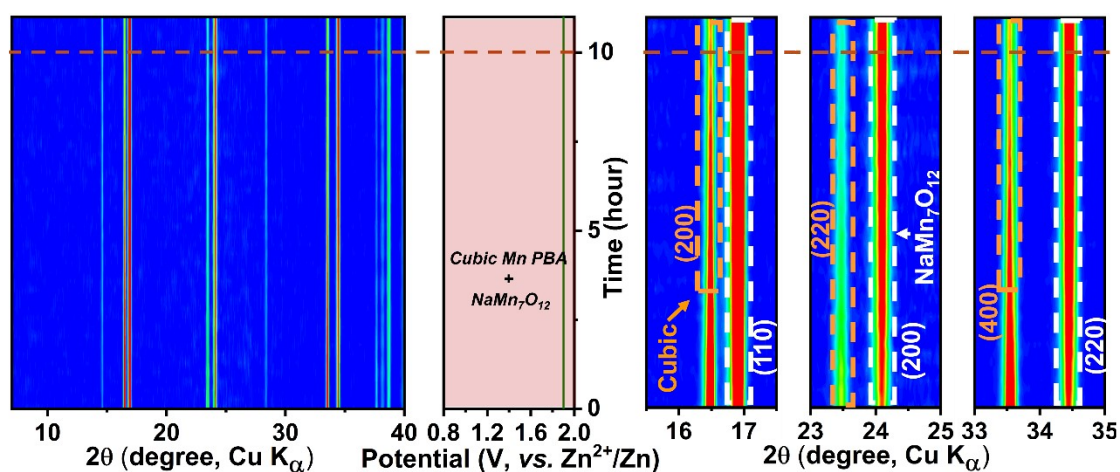

**Figure S7** Operando XRD showing the structural evolution of Mn-PBA-H in 1M ZnSO<sub>4</sub> holding at OCV after 1<sup>st</sup> charge.

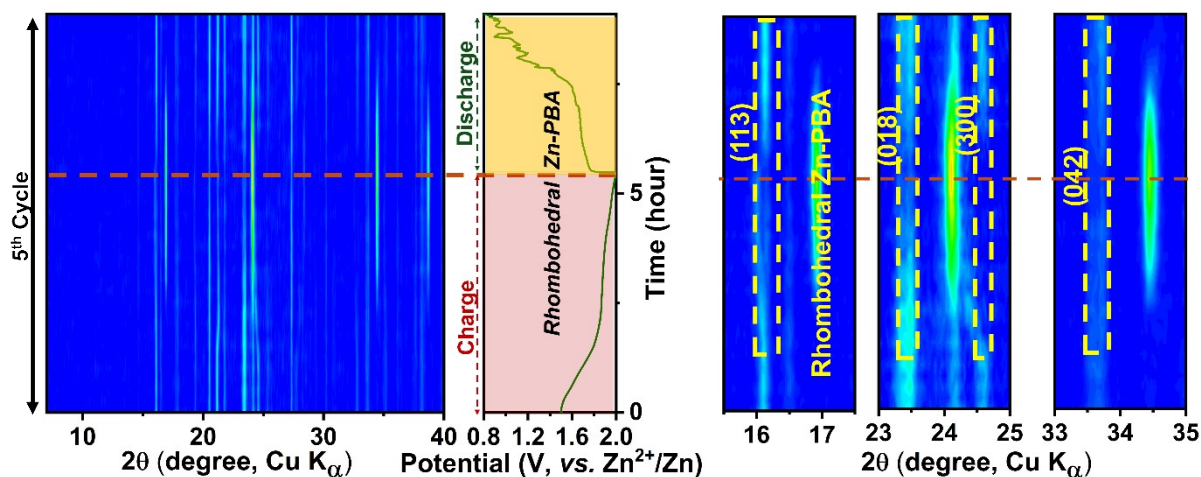

**Figure S8** Operando XRD showing the structural evolution of Mn-PBA-H in 1M ZnSO<sub>4</sub> during the 5<sup>th</sup> charge-discharge cycle.

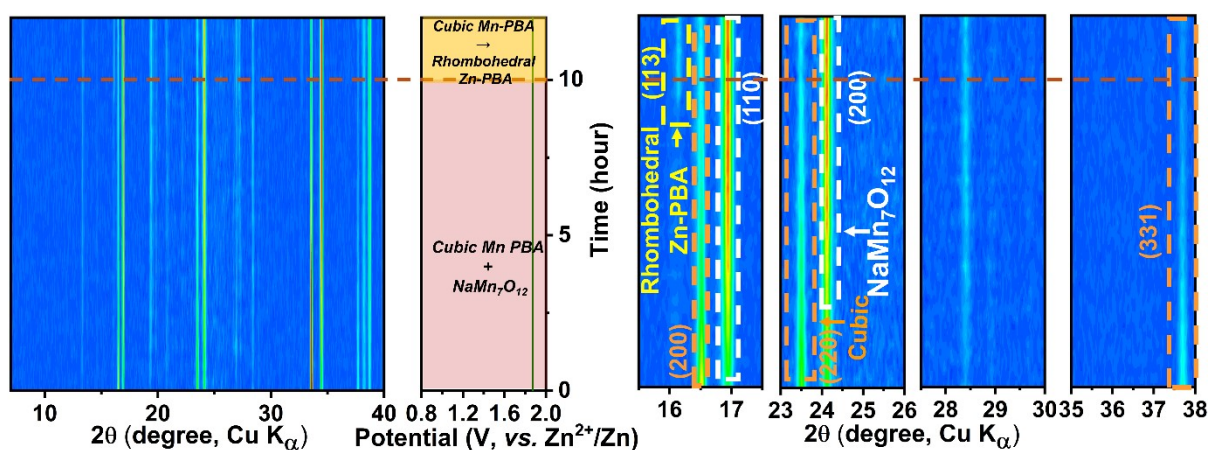

**Figure S9** Operando XRD showing the structural evolution of Mn-PBA-H in 1M ZnSO<sub>4</sub> + 1M Na<sub>2</sub>SO<sub>4</sub> holding at OCV after 1<sup>st</sup> charge.

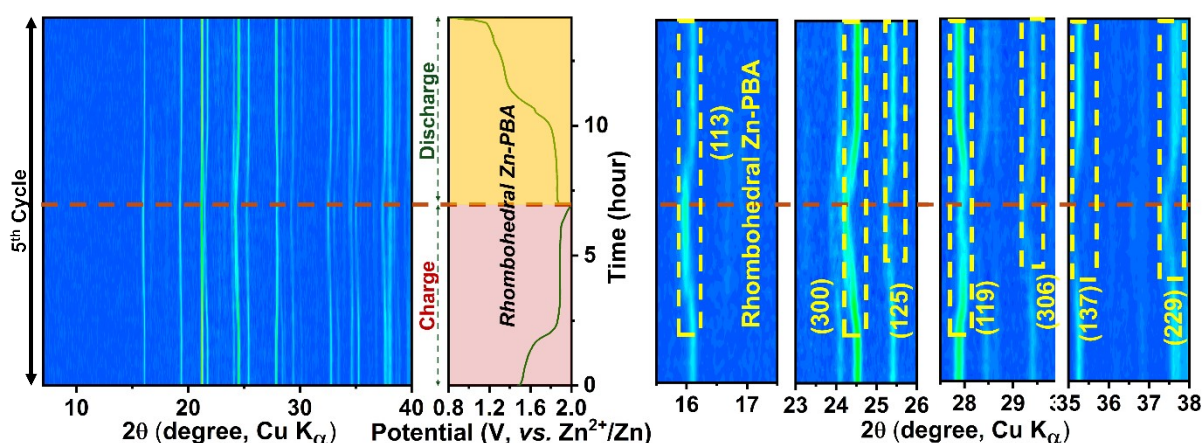

**Figure S10** Operando XRD showing the structural evolution of Mn-PBA-H in 1M ZnSO<sub>4</sub> + 1M Na<sub>2</sub>SO<sub>4</sub> during the 5<sup>th</sup> charge-discharge cycle.

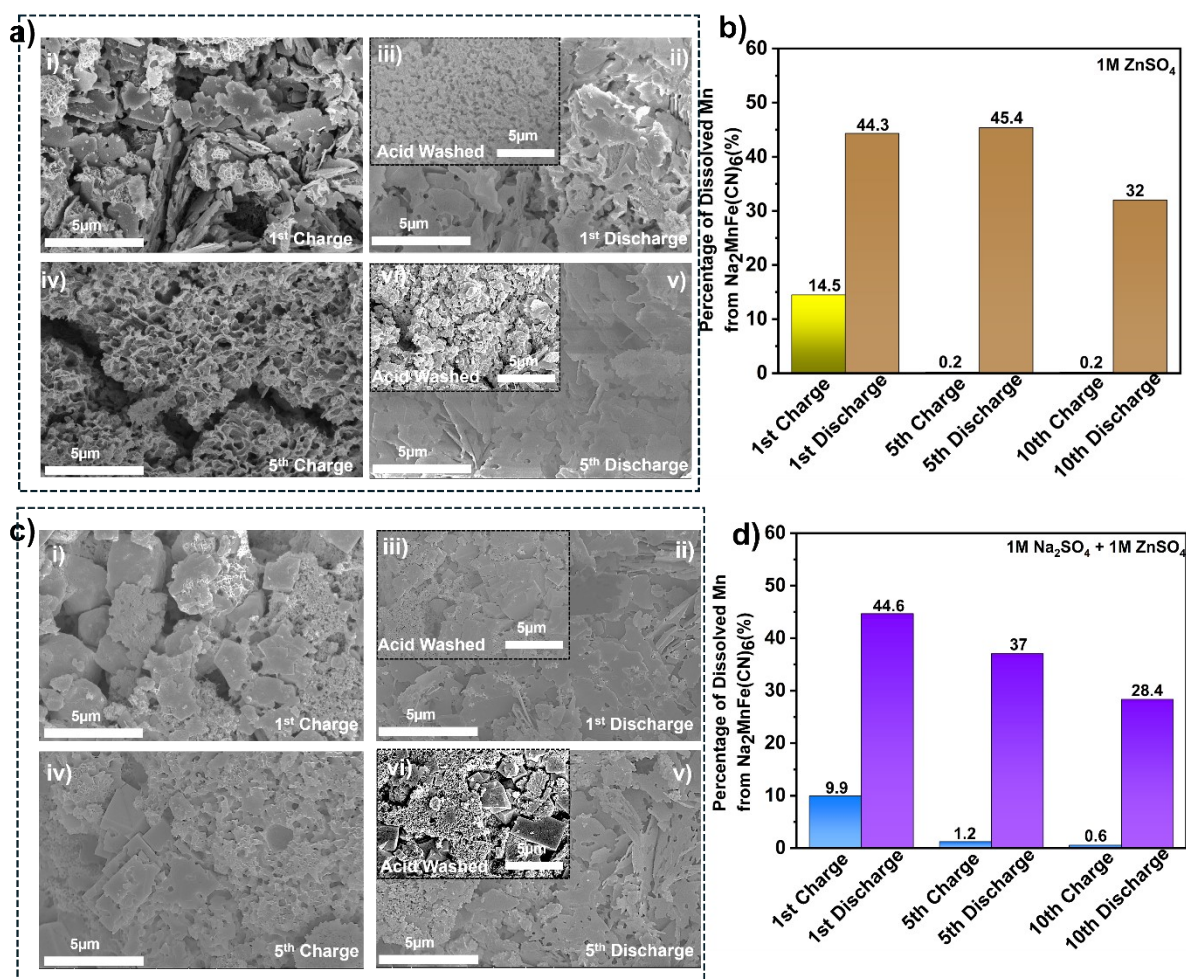

**Figure S11.** Electrode morphology after cycling in (a-b) 1M ZnSO<sub>4</sub> and (c-d) 1M ZnSO<sub>4</sub>+1M Na<sub>2</sub>SO<sub>4</sub> after 1<sup>st</sup> and 5<sup>th</sup> charge-discharge cycle alongside their respective Mn<sup>2+</sup> concentration analysed after 1<sup>st</sup>, 5<sup>th</sup> and 10<sup>th</sup> charge-discharge cycle, confirming the dissolution-redeposition process.

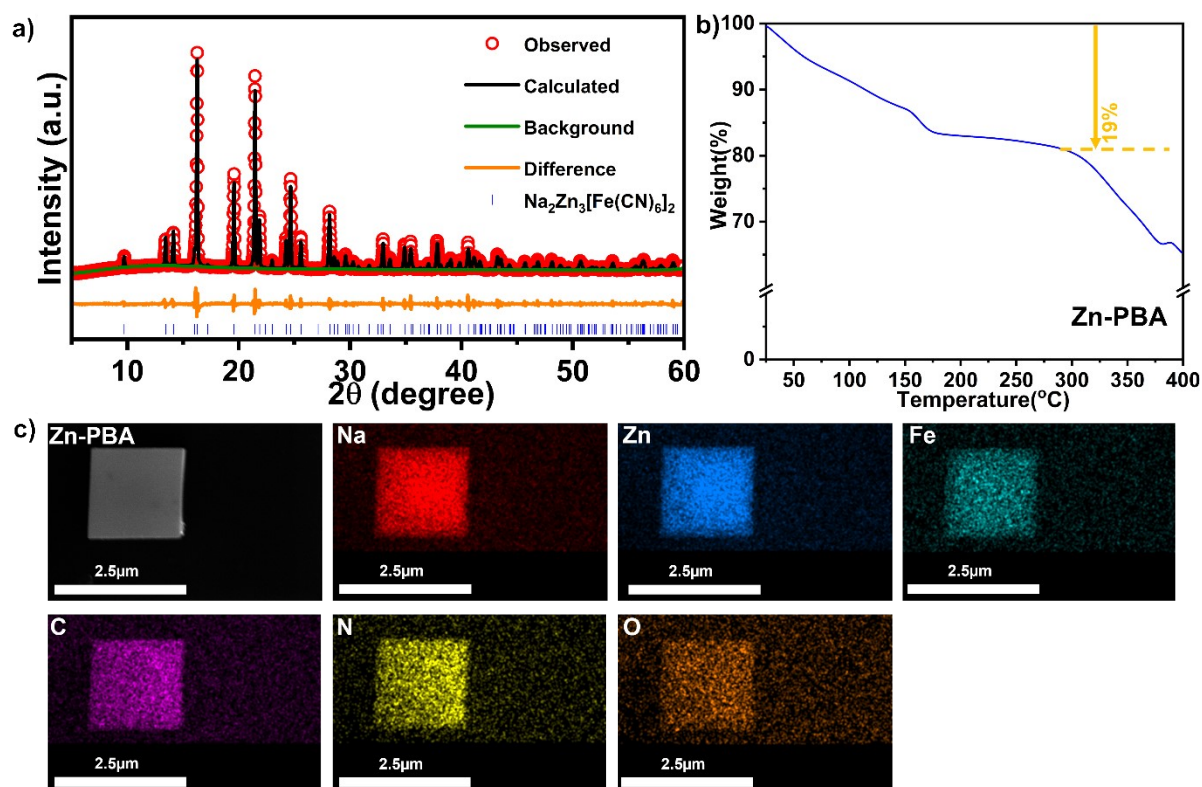

**Figure S12.** Rietveld refinement ( $R_{wp}$ :3.0%,  $\chi^2(\text{gof})$ :3.91) of the laboratory powder XRD data of as-prepared Zn-PBA, using ICSD reference #266392, confirms rhombohedral (R3c: H) phase. Observed data points (o symbol); calculated profile (black line); difference profile (orange line); Bragg positions (blue ticks); TGA showing the interstitial water while EDS confirms uniform elemental distribution throughout the particle.

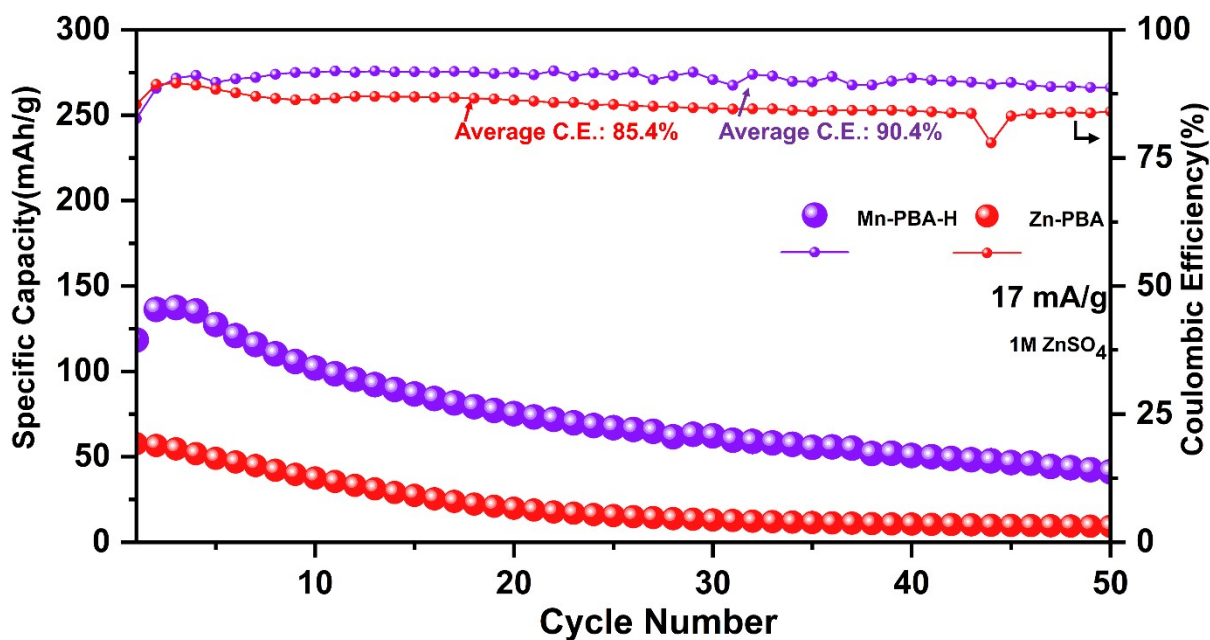

**Figure S13.** Long-term cycling stability of the Mn-PBA-H and Zn-PBA in 1M  $\text{ZnSO}_4$  at 17  $\text{mA g}^{-1}$ .

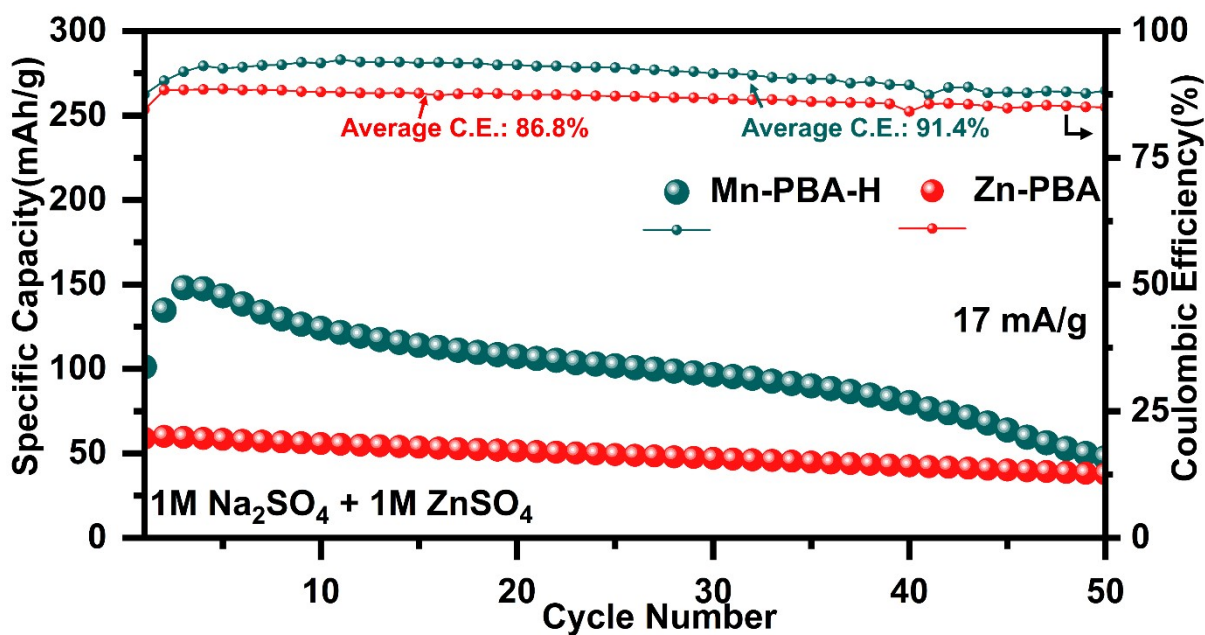

**Figure S14.** Long-term cycling stability of the Mn-PBA-H and Zn-PBA in 1M Na<sub>2</sub>SO<sub>4</sub> + 1M ZnSO<sub>4</sub> at 17 mA g<sup>-1</sup>.

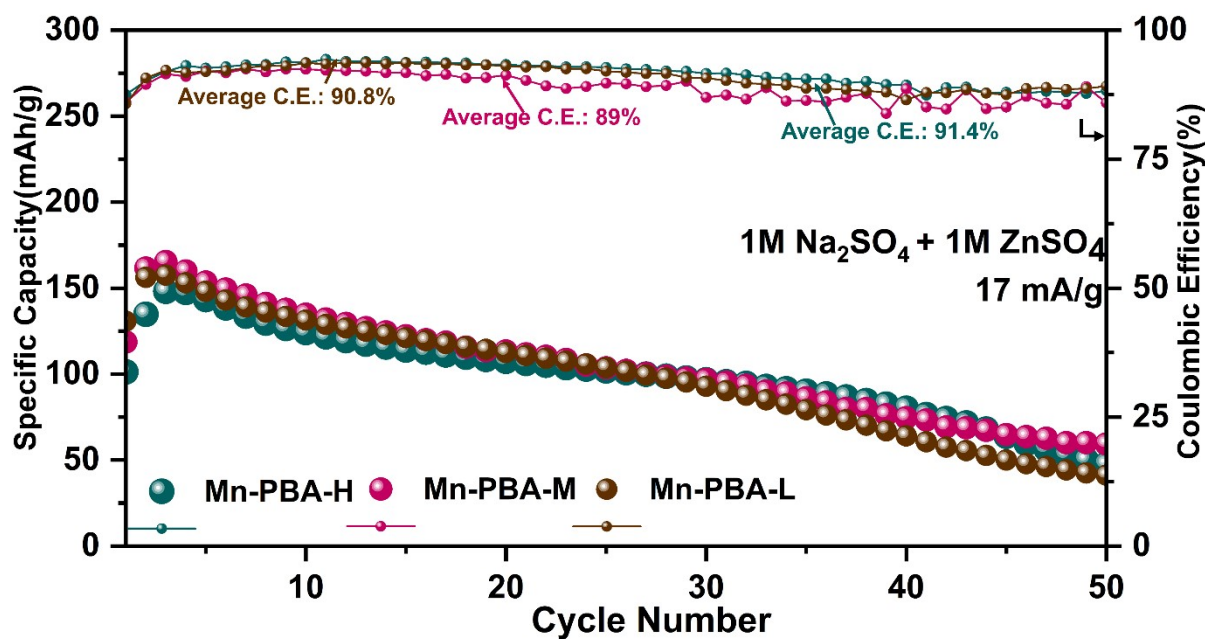

**Figure S15.** Long-term cycling stability of the all the variants in 1M Na<sub>2</sub>SO<sub>4</sub> + 1M ZnSO<sub>4</sub> at 17 mA g<sup>-1</sup>.

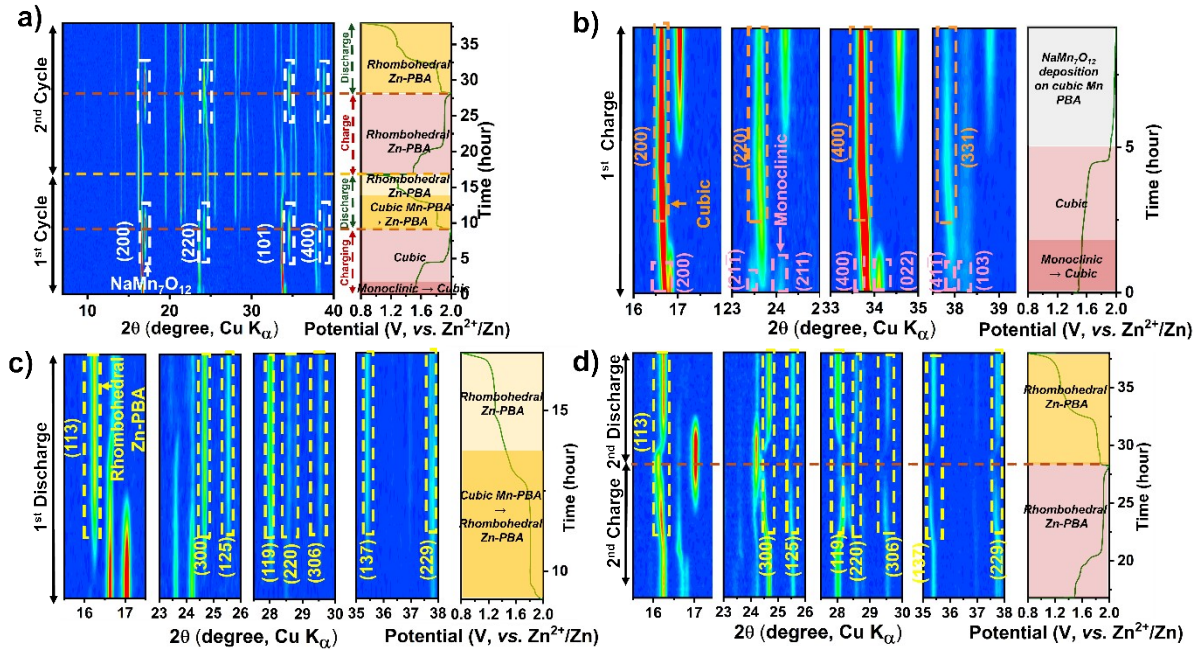

**Figure S16.** Operando XRD contour plots showing the phase evolution of Mn-PBA-M in 1 M  $Na_2SO_4$  + 1 M  $ZnSO_4$  electrolyte. (a) show the first two charge–discharge cycles, (b) the first charge, (c) the first discharge, and (d) the second charge–discharge cycle. Key phase transformations and structural evolutions during cycling are highlighted by arrows, labels, and legends.

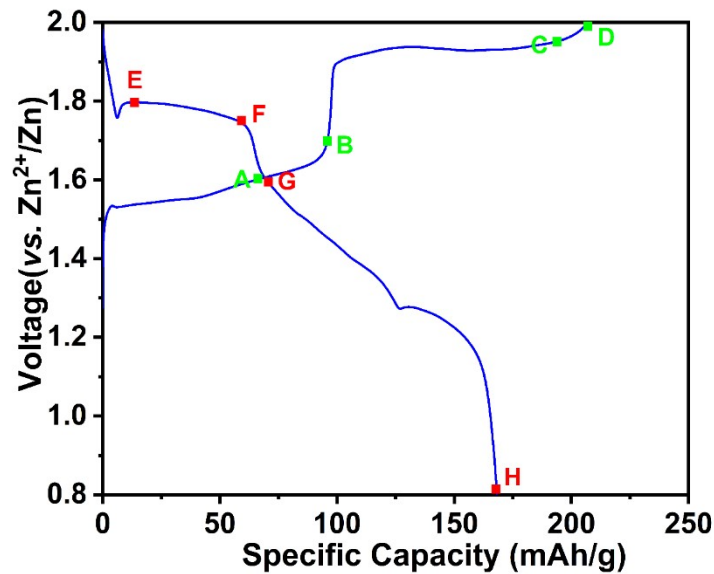

**Figure S17.** Voltage profile of Mn-PBA-H in 1M  $Na_2SO_4$  + 1M  $ZnSO_4$  at C/10 (17mA/g) with voltage points representing ex-situ XAS study

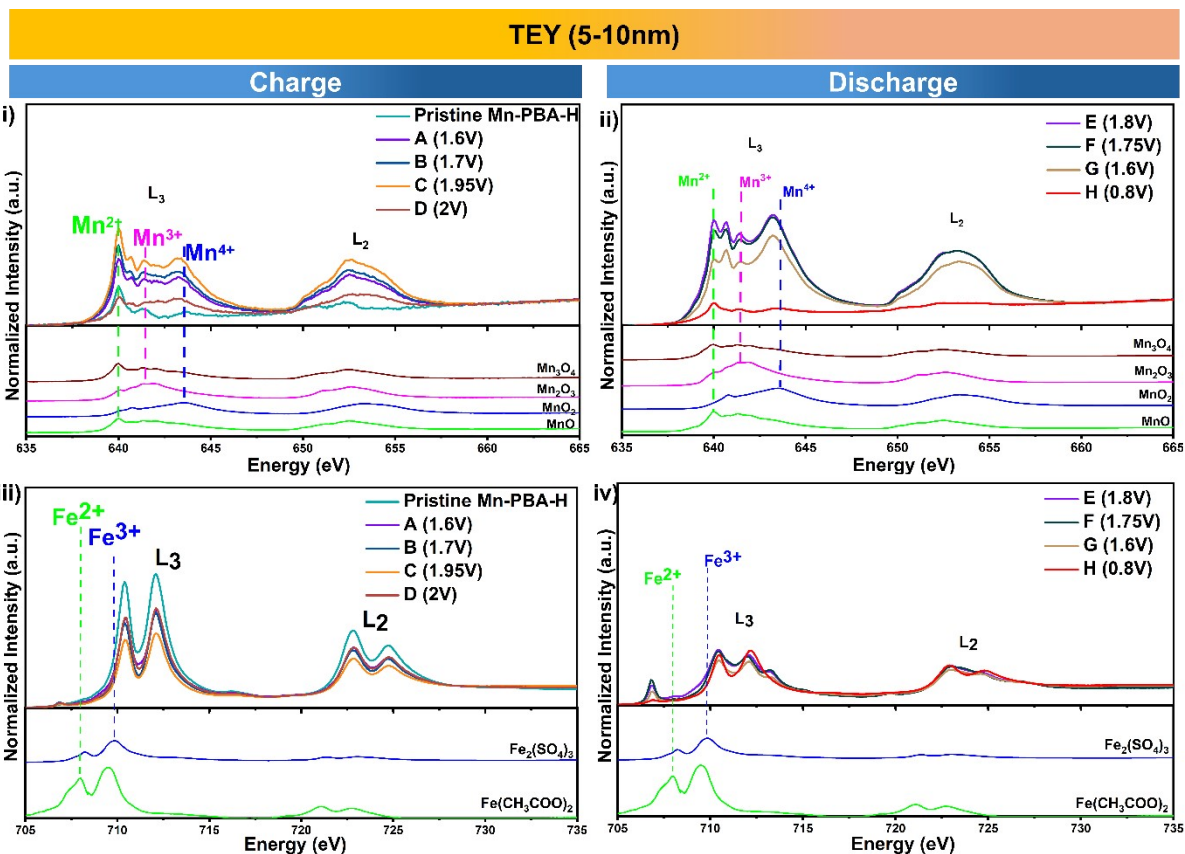

**Figure S18.** Surface sensitive XAS TEY L-edge of Mn and Fe during 1<sup>st</sup> charge/discharge.

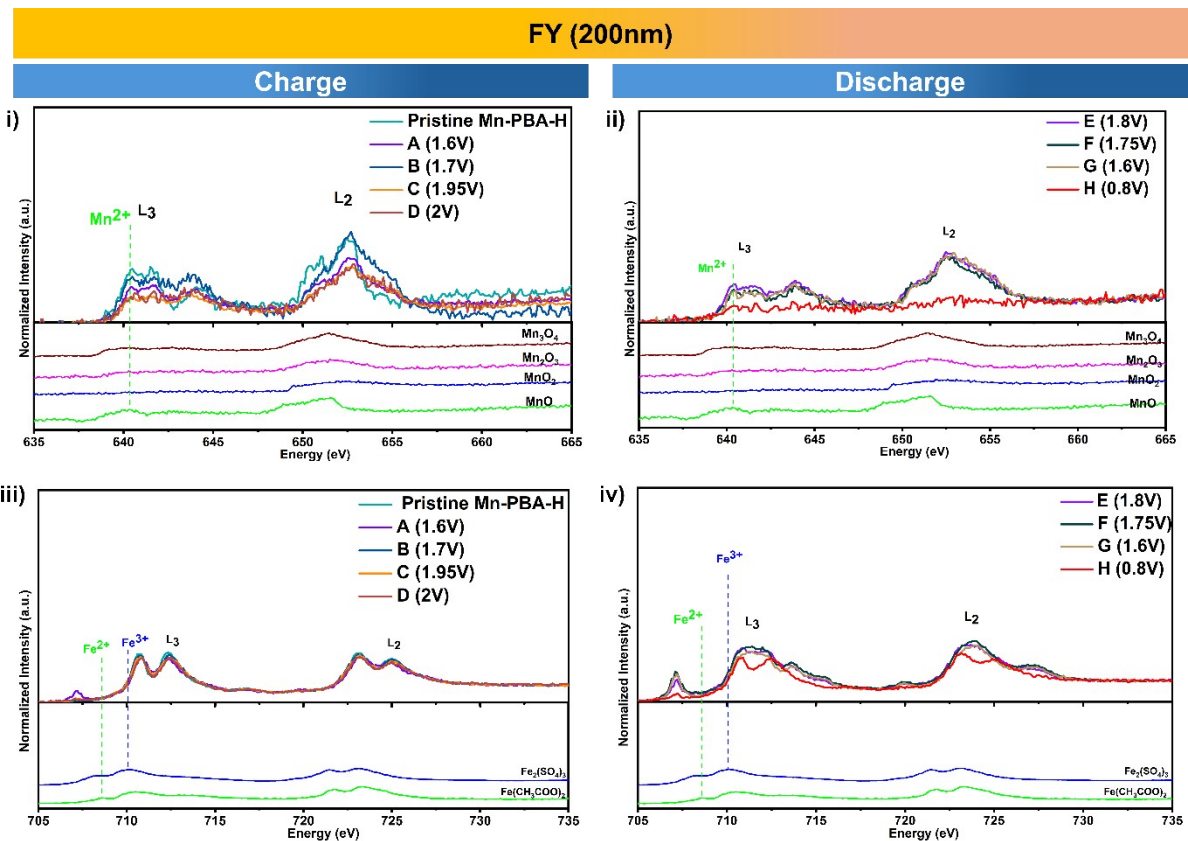

**Figure S19** Surface sensitive XAS FY L-edge of Mn and Fe during 1<sup>st</sup> charge/discharge.

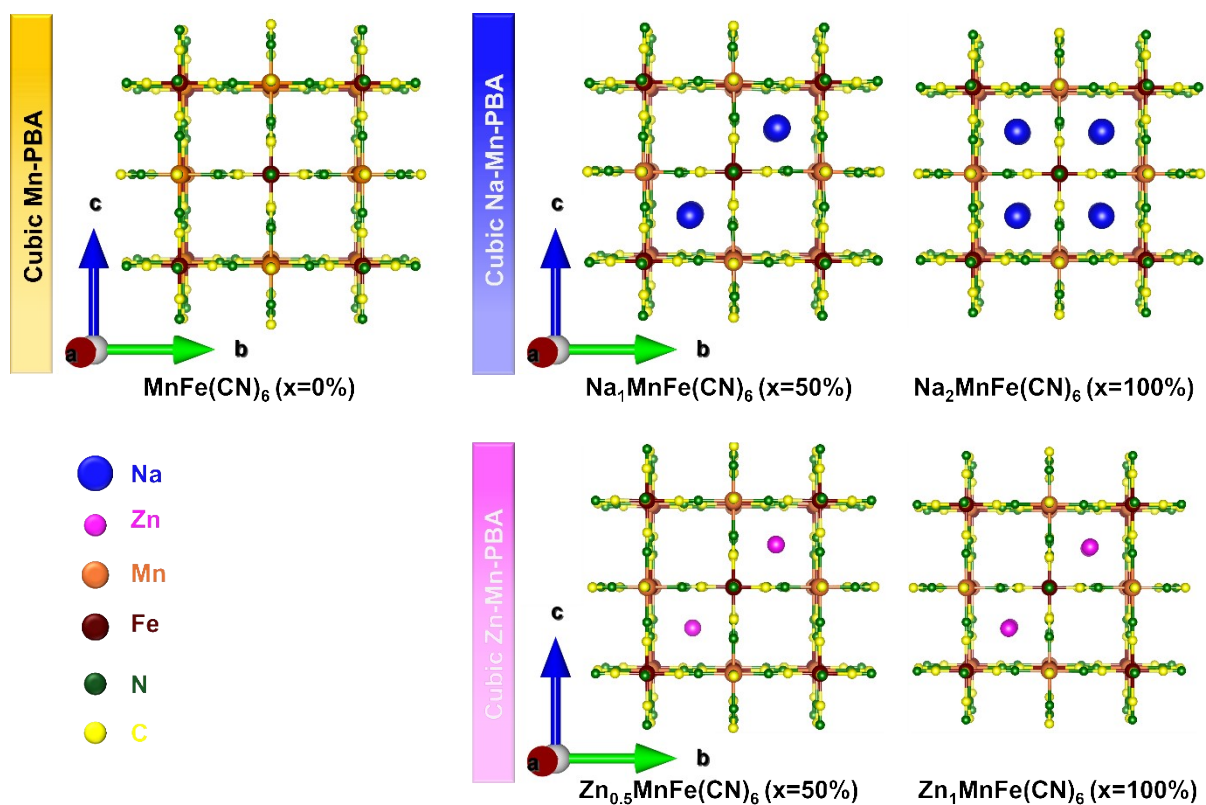

**Figure 20.** The relaxed structures showing the fully deintercalated Mn-PBA framework alongside the respective half-filled and full-filled Na<sup>+</sup> and Zn<sup>2+</sup> ions in the Mn-PBA framework

**Table S2** Lattice parameters and the volume change in the simulated structures

| Structures                 | Lattice Parameters |       |       |       |       |       | Volume (Å <sup>3</sup> ) | Volume Change (%) |
|----------------------------|--------------------|-------|-------|-------|-------|-------|--------------------------|-------------------|
|                            | a (Å)              | b (Å) | c (Å) | α (°) | β (°) | γ (°) |                          |                   |
| <b>Cubic Mn-PBA (x=0%)</b> | 10.65              | 10.65 | 10.65 | 90    | 90    | 90    | 1207.81                  |                   |
| <b>Na-Mn-PBA (x=50%)</b>   | 10.65              | 10.08 | 10.08 | 90    | 90    | 90    | 1083.12                  | -10.32            |
| <b>Na-Mn-PBA (x=100%)</b>  | 10.13              | 10.13 | 10.13 | 90    | 90    | 90    | 1040.82                  | -13.83            |
| <b>Zn-Mn-PBA (x=50%)</b>   | 10.46              | 10.46 | 10.46 | 90    | 90    | 90    | 1144.98                  | -5.20             |
| <b>Zn-Mn-PBA (x=100%)</b>  | 10.28              | 10.60 | 10.60 | 90    | 90    | 90    | 1153.99                  | -4.46             |

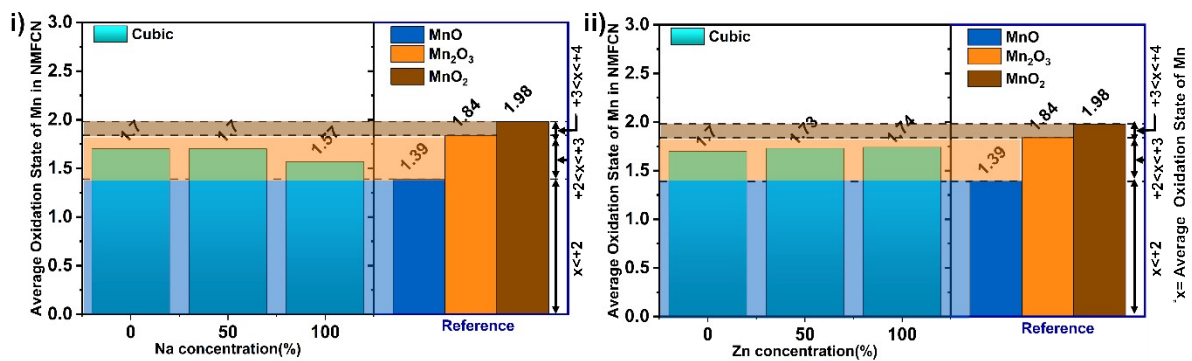

**Figure 21.** Average Mn oxidation state calculated from Bader charge analysis as a function of (i) Na<sup>+</sup> and (ii) Zn<sup>2+</sup> intercalation in the Mn-PBA framework.
